# Supplementary material for: Interfacial Atomic Structure of Twisted Few-Layer Graphene
Source: PubMed Central journal article supplement (PMC4758067; doi:10.1038/srep21273), 2016-02-18
Supplement: srep21273-s1.pdf [file srep21273-s1.pdf]

## Supplementary Information

### Interfacial Atomic Structure of Twisted Few-Layer Graphene

Ryo Ishikawa<sup>1\*</sup>, Nathan R. Lugg<sup>1</sup>, Kazutoshi Inoue<sup>2</sup>, Hidetaka Sawada<sup>3</sup>,  
Takashi Taniguchi<sup>4</sup>, Naoya Shibata<sup>1</sup> and Yuichi Ikuhara<sup>1,2</sup>

<sup>1</sup>Institute of Engineering Innovation, University of Tokyo, Bunkyo, Tokyo 113-8656, Japan

<sup>2</sup>World Premier International Research Center, Advanced Institute for Materials Research, Tohoku University, Sendai, 980-8577, Japan

<sup>3</sup>Electron Optics Division, JEOL Ltd., Tokyo 196-8558, Japan

<sup>4</sup>Advanced Key Technologies Division, National Institute for Materials Science, Tsukuba 305-0044, Japan

\*E-mail: [ishikawa@sigma.t.u-tokyo.ac.jp](mailto:ishikawa@sigma.t.u-tokyo.ac.jp)

| $\Sigma$ | $L$ (nm) | $\bar{\theta}$ | $\theta$ | $(m, n)$ |
|----------|----------|----------------|----------|----------|
| 7        | 0.65     | 21.79          | 21.79    | (1, 2)   |
|          |          |                | 38.21    | (1, 4)   |
| 13       | 0.89     | 27.8           | 32.2     | (1, 3)   |
|          |          |                | 27.8     | (2, 5)   |
| 19       | 1.07     | 13.17          | 46.83    | (1, 7)   |
|          |          |                | 13.17    | (2, 3)   |
| 31       | 1.37     | 17.9           | 42.1     | (1, 5)   |
|          |          |                | 17.9     | (4, 7)   |
| 37       | 1.49     | 9.43           | 50.57    | (1, 10)  |
|          |          |                | 9.43     | (3, 4)   |
| 43       | 1.61     | 15.18          | 44.82    | (1, 6)   |
|          |          |                | 15.18    | (5, 8)   |
| 49       | 1.72     | 16.43          | 43.57    | (2, 11)  |
|          |          |                | 16.43    | (3, 5)   |
| 61       | 1.92     | 7.34           | 52.66    | (1, 13)  |
|          |          |                | 7.34     | (4, 5)   |
| 67       | 2.01     | 24.43          | 35.57    | (2, 7)   |
|          |          |                | 24.43    | (5, 11)  |
| 73       | 2.10     | 11.64          | 48.36    | (1, 8)   |
|          |          |                | 11.64    | (7, 10)  |
| 79       | 2.18     | 26.01          | 26.01    | (3, 7)   |
|          |          |                | 33.99    | (4, 13)  |
| 91       | 2.34     | 6.01           | 53.99    | (1, 16)  |
|          |          |                | 6.01     | (5, 6)   |
|          |          |                | 10.42    | (1, 9)   |
|          |          |                | 10.42    | (8, 11)  |
| 97       | 2.42     | 29.41          | 29.41    | (3, 8)   |
|          |          |                | 30.59    | (5, 14)  |
| 103      | 2.49     | 19.65          | 40.35    | (2, 9)   |
|          |          |                | 19.65    | (7, 13)  |
| 109      | 2.56     | 10.99          | 49.01    | (2, 17)  |
|          |          |                | 10.99    | (5, 7)   |
| 127      | 2.77     | 5.09           | 54.91    | (1, 19)  |
|          |          |                | 5.09     | (6, 7)   |
| 133      | 2.83     | 8.61           | 51.39    | (1, 11)  |
|          |          |                | 8.61     | (10, 13) |
|          |          |                | 25.04    | (4, 9)   |
|          |          |                | 34.96    | (5, 17)  |
| 139      | 2.90     | 25.46          | 34.54    | (3, 10)  |
|          |          |                | 25.46    | (7, 16)  |

**Figure S1** | The list of structure parameters for TBG ( $\Sigma \leq 139$ ), where the parameters are coincidence index  $\Sigma$ , lattice parameter  $L$ , twist angle  $\theta$ , conjugate twist angle  $\bar{\theta}$  and a pair index  $(m, n)$ .

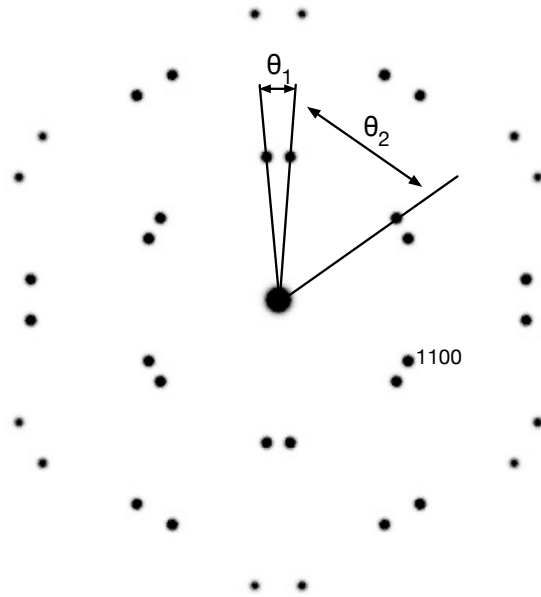

**Figure S2** | The electron diffraction pattern calculated from the bilayer graphene  $\Sigma(1,10) = 37$ , where the true twist angle for  $\Sigma(1,10) = 37$  is  $50.57$  ( $=\theta_2$ ).

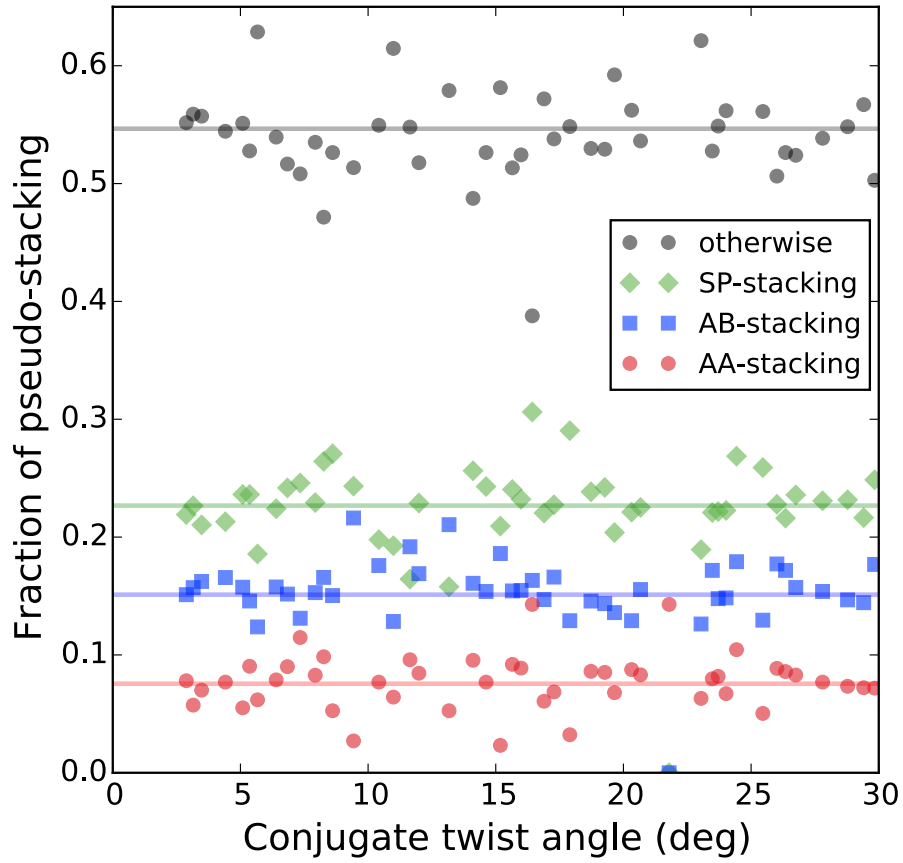

**Figure S3** | Fraction of pseudo AA-, AB-, SP- and other-stacking orders as a function of conjugate twist angle. The used angles are calculated from the corresponding coincidence indices ( $<400$ ) shown in Fig. 3(e). The horizontal colored lines are the estimated fractions with the criterion of  $r_0 = a_0/4$  ( $0.20 \text{ \AA}$ ).
